# Supplementary material for: Engineering crystal water in potassium ammonium vanadate for fast Zn-ion storage
Source: Royal Society of Chemistry journal article supplement (doi:10.1039/d2cc06344a), 2022-12-06
Supplement: d2cc06344a1.pdf [file d2cc06344a1.pdf]

## Electronic Supplementary Information

### Engineering crystal water in potassium ammonium vanadate for fast Zn-ion storage

#### Experimental section

**Synthesis of potassium ammonium vanadate (KNVO) nanoribbons:** All chemical reagents were purchased from Kelong Chemical Reagent Factory (Chengdu, China) and used without any further purification. Firstly, 20 mmol of  $\text{NH}_4\text{VO}_3$  and  $\text{H}_2\text{C}_2\text{O}_4 \cdot \text{H}_2\text{O}$  were dissolved in deionized water (150 ml), and then 30 mmol of  $\text{K}_2\text{S}_2\text{O}_8$  was added to the above mixture under magnetic stirring for 10 min. After that, the mixture was transferred into a 200 ml Teflon-lined autoclave and kept at 180 °C for 3 hours. Using vacuum filtration, the brick-red precipitate was collected, rinsed with deionized water and anhydrous ethanol, and dried at 60 °C. The as-obtained KNVO nanoribbons were sintered at 200 °C, 300 °C, 400 °C, and 550 °C, respectively, for 3 hours in the atmosphere to obtain the final products.

**Material characterization:** X-ray diffraction (XRD) data of the samples were measured on an Empyrean X-ray diffractometer (Cu  $\text{K}\alpha$  radiation, 40 kV and 40 mA). High-resolution transmission electron microscope (HRTEM) images were acquired by transmission electron microscope (Talos F200S G2, 200 kV). Vacancy data were determined by electron paramagnetic resonance spectrometry (Bruker A300). X-ray photoelectron spectroscopy (XPS) data were acquired by

a Thermo Fisher Escalab Xi+ instrument. Thermogravimetric curves were obtained utilizing the thermal gravimetric analyzer (TGA).

***Electrochemical characterization:*** Electrochemical characterization was carried out in a coin-type cell (CR2032). The working electrodes were prepared as follows: KNVO nanoribbons were thoroughly mixed with carbon black (Super P) and polytetrafluoroethylene (PTFE) in a mass ratio of 70:20:10 in the presence of ethanol. After drying at 60 °C for 2h, the mixture was pressed into films and cut into discs. The electronic balance (Sartorius BSA124S) was used to measure the mass of the cathode. KNVO discs with a mass loading of 3-8 mg cm<sup>-2</sup> were selected as the cathode, 80 μm thick zinc foils as the anode, and 3 M zinc trifluoromethanesulfonate (Zn(OTF)<sub>2</sub>) as the electrolyte to assemble the button cell. The LANHE battery tester (Wuhan, China) was used for charge and discharge (0.2-1.6 V vs. Zn/Zn<sup>2+</sup>) tests at room temperature. Cyclic voltammetry (CV) and electrochemical impedance spectroscopy (EIS) tests were carried out using a CorrTest (CS310H) electrochemical workstation in the frequency range of 10<sup>5</sup> and 0.01 Hz. It is worth noting that all electrochemical tests were preceded by 2 hours resting process for all cells. The apparent chemical diffusion coefficients of the materials were determined during the galvanostatic intermittent titration technique (GITT).

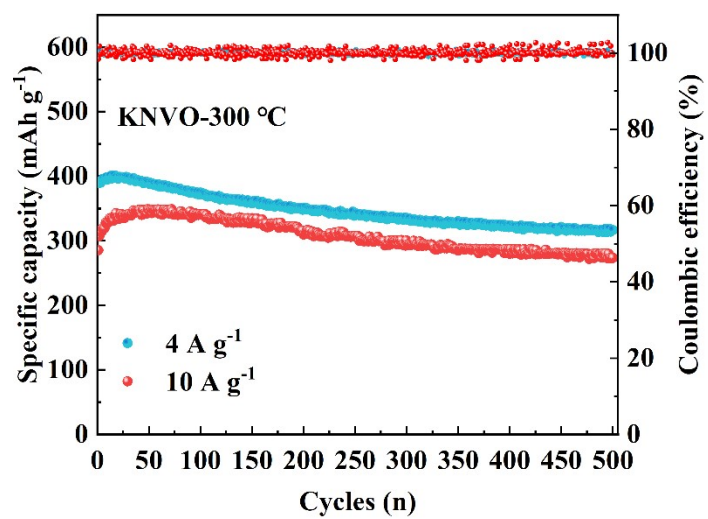

**Fig. S1** Cycling performance at 4 and 10 A g<sup>-1</sup>.

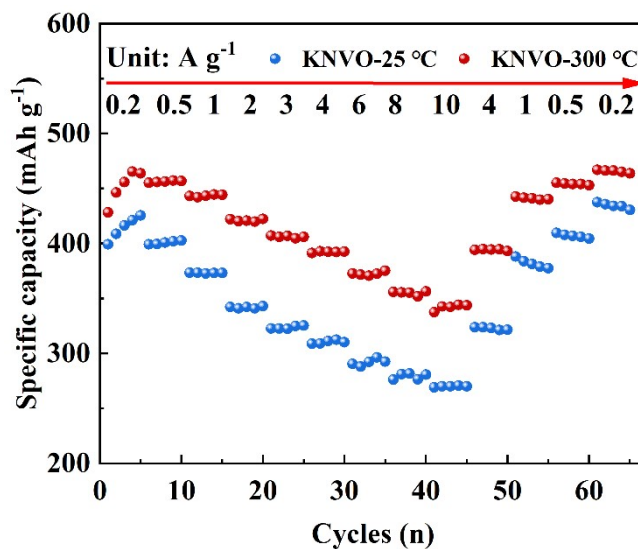

**Fig. S2** Discharge capacity at different current densities in aqueous electrolytes after normalization, where the mass of crystal waters and the removed ammonium before 300 °C in the KNVO-25 °C does not count.

**Note S1.** We have normalized the KNVO-25 °C specific capacity by combining the TGA test data in Fig. 1b (as shown in Fig. S2), where the mass of crystal waters and the removed ammonium before 300 °C in the KNVO-25 °C does not count. The improved electrochemical performance of the annealed KNVO-300 °C still can be identified.

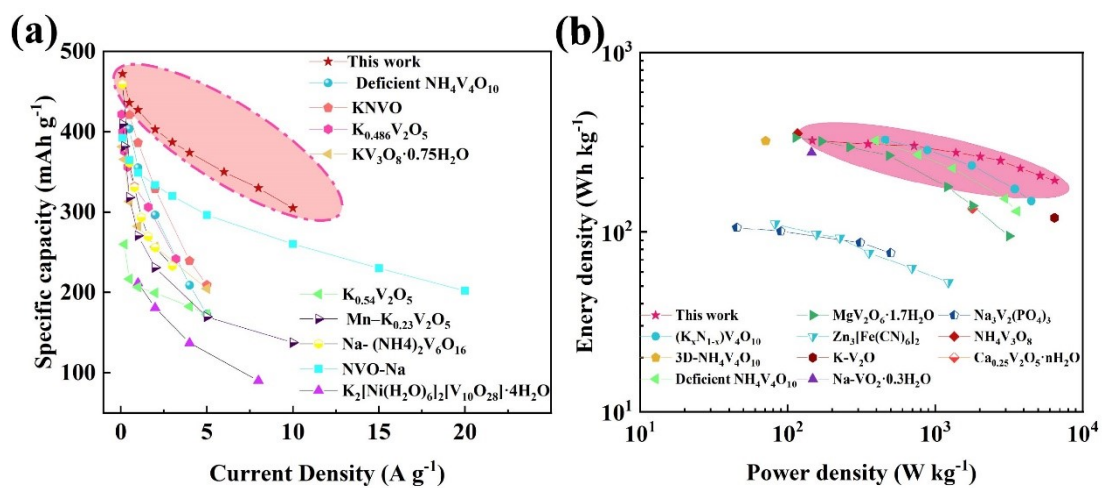

**Fig. S3** (a) Comparison of electrochemical performance of cathode materials between this work and other previous reports.<sup>1-9</sup> (b) Ragone plot of KNVO samples compared to the previously reported performance of AZIBs cathode materials.<sup>1, 2, 7-11</sup>

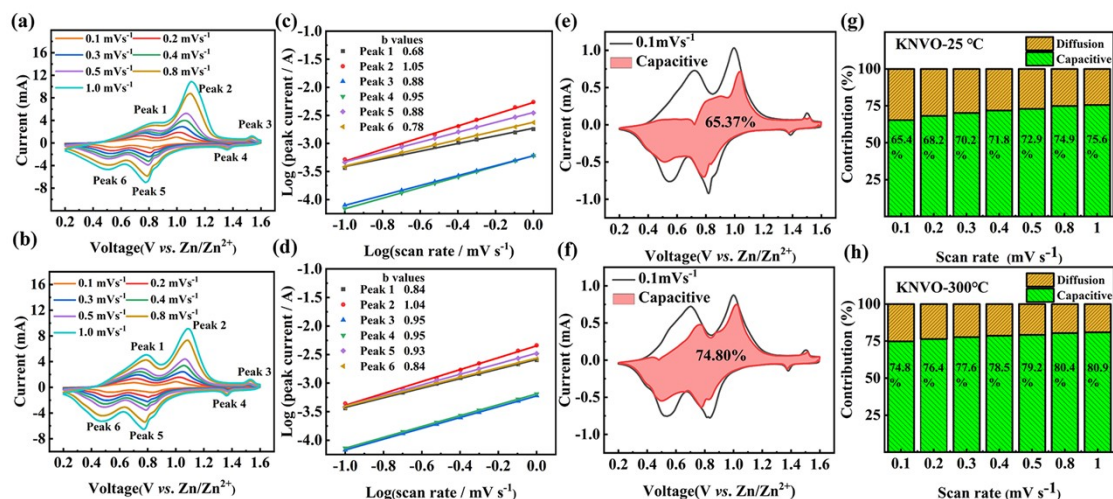

**Fig. S4** CV curves at different current densities for (a) KNVO-25 °C and (b) KNVO-300 °C. The plot of peak current versus scan rate for the CV curves of (c) KNVO-25 °C and (d) KNVO-300 °C. The b values are the slope values of the fitted curves. CV curves of pseudocapacitance fraction calculated for (e) KNVO-25 °C and (f) KNVO-300 °C at a scan rate of 0.1 mV s<sup>-1</sup>. Capacitance contribution of (g) KNVO-25 °C and (h) KNVO-300 °C at different scan rates.

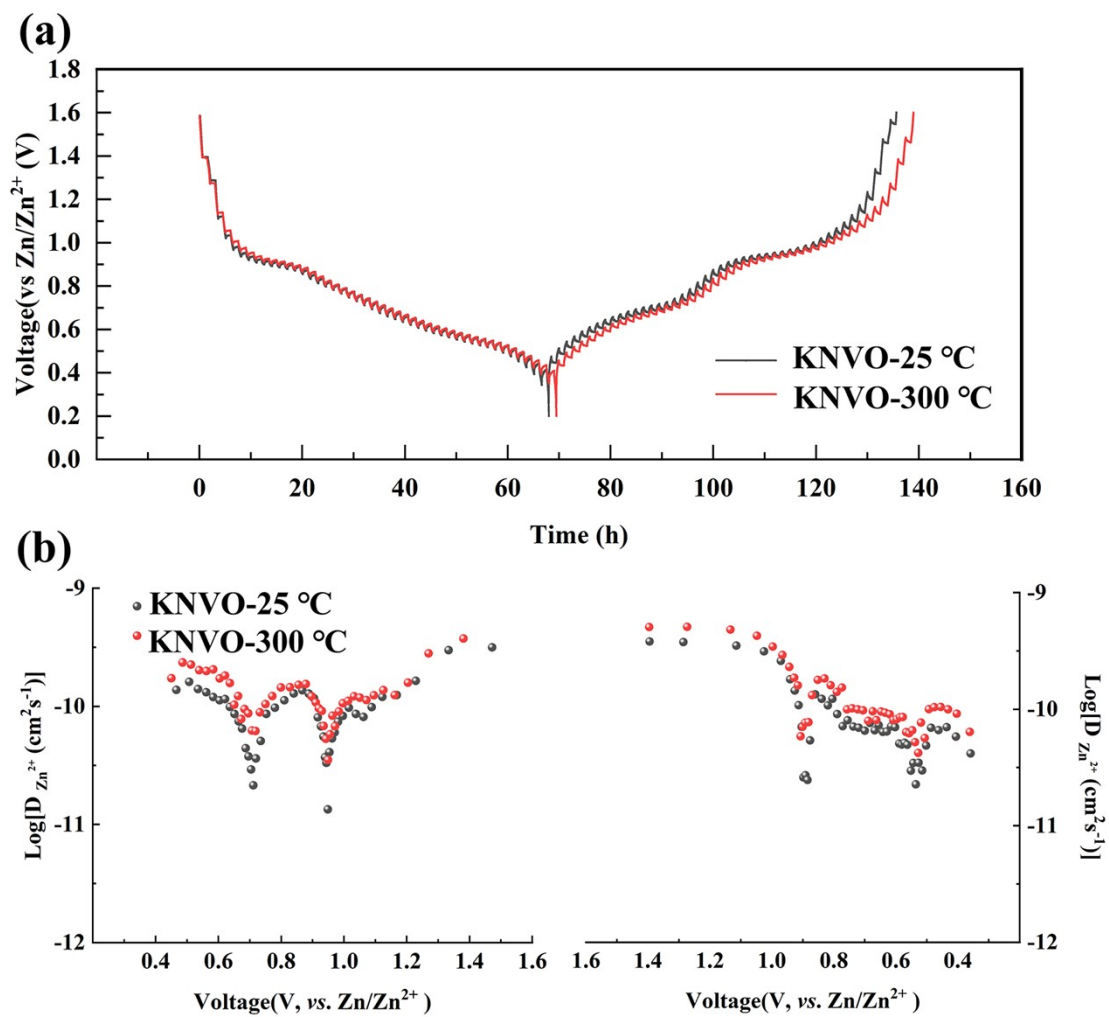

**Fig. S5** (a) GITT charge and discharge curves. (b) Ion diffusion coefficients corresponding to KNVO-25 °C and KNVO-300 °C.

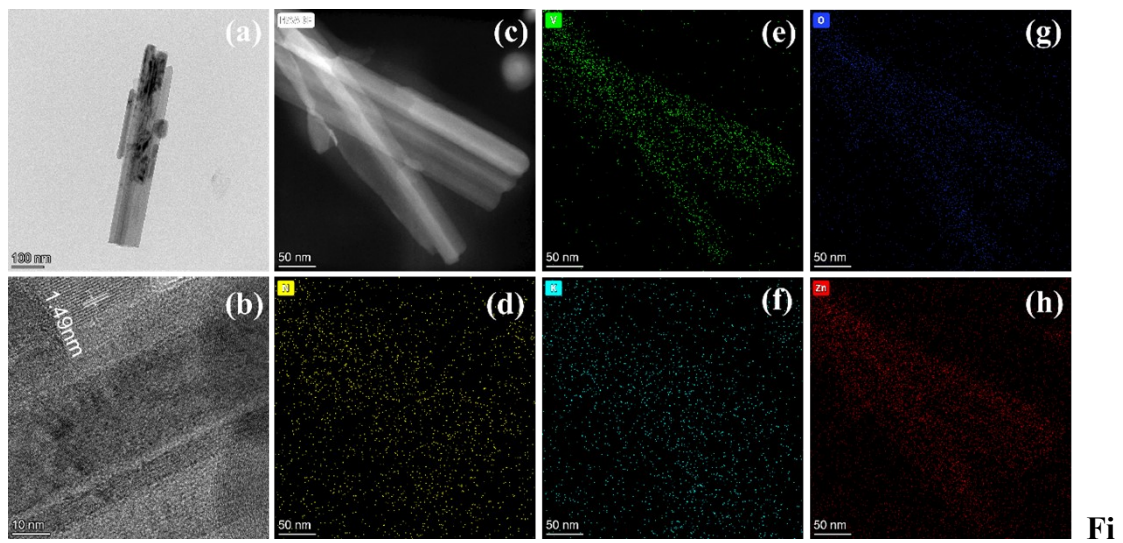

**g. S6** Structural and morphological of KNVO-25 °C charged to 1.6 V.

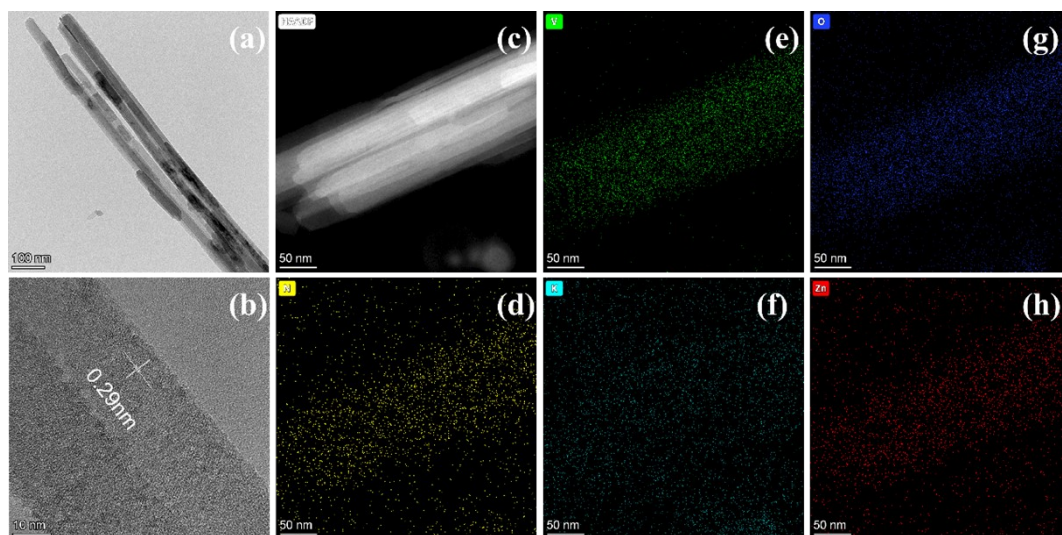

**Fig. S7** Structural and morphological of KNVO-300 °C charged to 1.6 V.



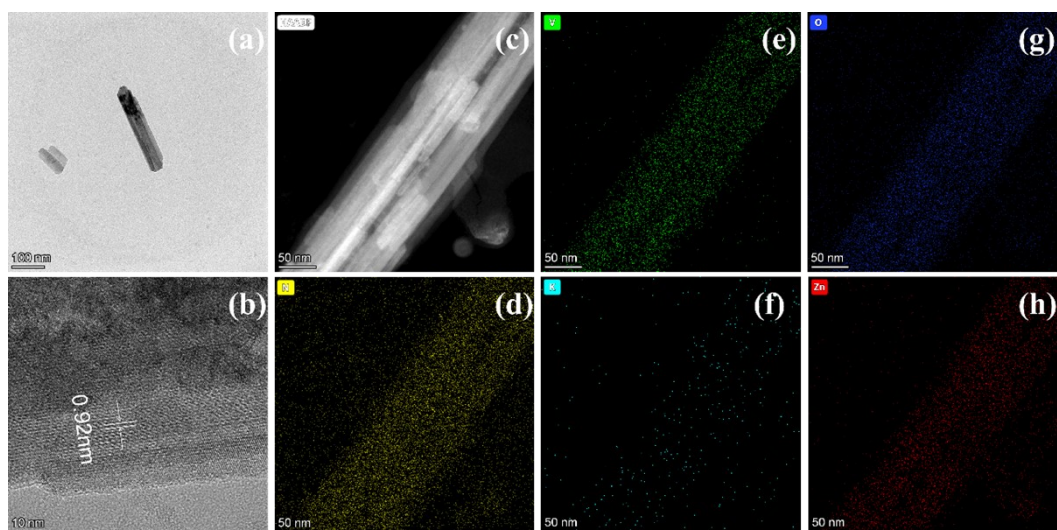

**Fig. S8** Structural and morphological of KNVO-300 °C discharged to 0.2 V.

Based on the data from the GITT test, the ionic diffusion coefficient ( $D$ ) inside the battery can be calculated with the following formula<sup>12</sup>:

$$D_{zn} = \frac{4}{\pi\tau} \left( \frac{m_B V_M}{M_B A} \right)^2 \left( \frac{\Delta E_s}{\Delta E_\tau} \right)^2 \quad (1)$$

where  $\tau$  represents the duration of the constant current (s),  $m_B$  is the mass of the active material,  $V_M$  is the molar volume ( $\text{cm}^3 \text{mol}^{-1}$ ),  $M_B$  is the molar mass,  $A$  is the total contact area between the electrode and the electrolyte,  $\Delta E_s$  represents the voltage difference (V) between the steady-state voltage after the retardation and the previous steady-state voltage, while  $\Delta E_\tau$  represents the value of the voltage change (V) due to the duration of the constant current.

### Supplementary References

1. Q. Zong, W. Du, C. Liu, H. Yang, Q. Zhang, Z. Zhou, M. Atif, M. Alsalhi and G. Cao, *Nanomicro Lett*, 2021, **13**, 116.
2. Q. Zong, Q. Wang, C. Liu, D. Tao, J. Wang, J. Zhang, H. Du, J. Chen, Q. Zhang and G. Cao, *ACS Nano*, 2022, **16**, 4588-4598.
3. P. Wu, T. Xu, Y. Chen, Q. Yang, J. Wang, Y.-N. Liu and Y. Li, *ACS Applied Energy Materials*, 2022, **5**, 1656-1661.
4. X. Wang, A. Naveed, T. Zeng, T. Wan, H. Zhang, Y. Zhou, A. Dou, M. Su, Y. Liu and D. Chu, *Chem Eng J*, 2022, **446**, 137090.
5. Z. Shi, W. Xu, Q. Ru, M. Zheng, J. Zhang, F. Chi-Chun Ling and L. Wei, *J Power Sources*, 2021, **516**, 230699.
6. F. Wan, S. Huang, H. Cao and Z. Niu, *ACS Nano*, 2020, **14**, 6752-6760.
7. X. Wang, Z. Zhang, S. Xiong, F. Tian, Z. Feng, Y. Jia, J. Feng and B. Xi, *Small*, 2021, **17**, e2100318.
8. C. Xia, J. Guo, P. Li, X. Zhang and H. N. Alshareef, *Angew Chem Int Ed Engl*, 2018, **57**, 3943-3948.
9. Q. Li, X. Rui, D. Chen, Y. Feng, N. Xiao, L. Gan, Q. Zhang, Y. Yu and S. Huang, *Nanomicro Lett*, 2020, **12**, 67.
10. H. Jiang, Y. Zhang, Z. Pan, L. Xu, J. Zheng, Z. Gao, T. Hu, C. Meng and J. Wang, *Materials Chemistry Frontiers*, 2020, **4**, 1434-1443.
11. G. Li, Z. Yang, Y. Jiang, C. Jin, W. Huang, X. Ding and Y. Huang, *Nano Energy*, 2016, **25**, 211-217.
12. F. Liu, Z. Chen, G. Fang, Z. Wang, Y. Cai, B. Tang, J. Zhou and S. Liang, *Nanomicro Lett*, 2019,

11, 25.
